# Supplementary material for: Carbonic Anhydrase Inhibition as a Target for Antibiotic Synergy in Enterococci
Source: PubMed Central journal article supplement (PMC10434275; doi:10.1128/spectrum.03963-22), 2023-06-01
Supplement: spectrum.03963-22-s0001.pdf [file spectrum.03963-22-s0001.pdf]

**A**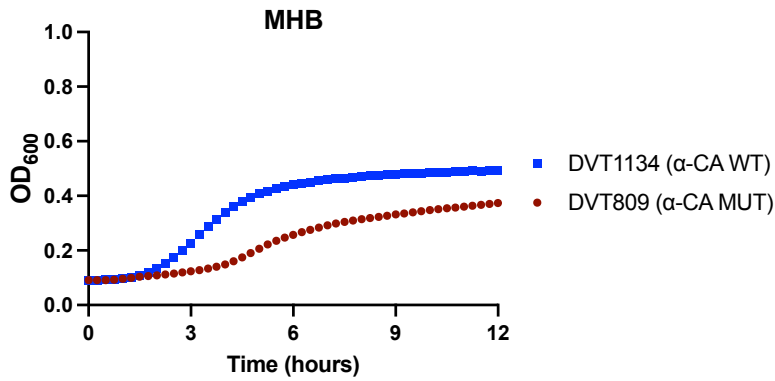**B**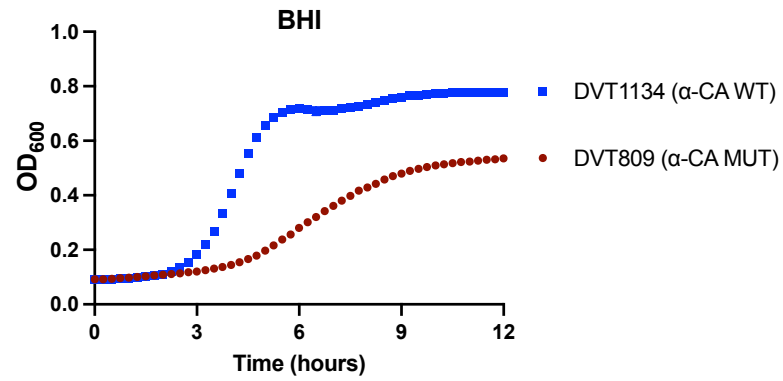

**FIG S1. *In vitro* growth differences between wild-type (WT) and alpha-carbonic anhydrase (α-CA) mutant (MUT) *E. faecalis* strains.** Strains were inoculated from overnight cultures into (A) Mueller Hinton Broth (MHB) or (B) Brain Heart Infusion (BHI) media and were grown at 37°C. OD<sub>600</sub> was recorded every 30 minutes for 12 hours.
